# Supplementary material for: PILRA regulates microglial neuroinflammation and lipid metabolism as a candidate therapeutic target for Alzheimer’s disease
Source: Research Square preprint supplement (doi:10.21203/rs.3.rs-3954863/v1), 2024-02-14
Supplement: Supplementary file 1 [file b068bef4e723d6827c7cf24c.xlsx]

## Sheet: Sheet1
Figure	iMG line	Parameter	Statististical Test	Statistic	p-value	Post-hoc
1c	1	TNFa	Two-way ANOVA	F (1, 8) = 36.93	P=0.0003	Šídák's
1c	1	IL-6	Two-way ANOVA	F (1, 8) = 11.70	P=0.0091	Šídák's
1c	1	IL-1b	Two-way ANOVA	F (1, 8) = 57.28	P<0.0001	Šídák's
1c	1	IP-10	Two-way ANOVA	F (1, 8) = 41.85	P=0.0002	Šídák's
1e	1,2	LPC (24:0)	Robust linear model	t=-2.99	P=0.0037
1e	1,2	LPC (24:1)	Robust linear model	t=-5.93	P=4.11E-06
1e	1,2	LPC (26:0)	Robust linear model	t=-3.50	P=0.0012
1e	1,2	LPC (26:1)	Robust linear model	t=-4.33	P=0.0002
2b	1	Lipid droplets	Two-way ANOVA	F (2, 36) = 23.67	P<0.0001	Tukey's
2c	1,2	CE (18:2)	Robust linear model	t=2.69	P=0.0071
2c	1,2	Cholesterol sulfate	Robust linear model	t=2.08	P=0.0323
2d	1	Cholesterol efflux	Unpaired t-test (two-tailed)	t=19.39, df=4	P<0.0001
2e	1	APOE expression	Two-way ANOVA	F (1, 24) = 67.37	P<0.0001	Šídák's
2f	n/a	COGDX score by APOE genotype	Ordinal logistic regression	OR=0.67; CI = 0.47-0.95	P=0.025	NA
2g	n/a	ApoE4 uptake	Paired t-test (two-tailed)	t=5.795, df=2	P=0.0285
2h	1	ApoE4 uptake	Paired t-test (two-tailed)	t=7.548, df=2	P=0.0171
2i	1	IP-10	Two-way ANOVA	F (1, 8) = 12.08	P=0.0084	Šídák's
3b	1	Spare capacity	Unpaired t-test (two-tailed)	t=16.93, df=4	P<0.0001
3c	1	ATP production	One-way ANOVA	F (2, 6) = 12.65	P=0.0070	Šídák's
3e	1	Cellular ROS	Two-way ANOVA	F (1, 8) = 124.4	P<0.0001	Šídák's
3g	1	Fragmented mitochondria	Two-way ANOVA	F (1, 16) = 54.38	P<0.0001	Šídák's
3i	1	DQ-BSA Proteolysis	Two-way ANOVA	F (1, 8) = 111.5	P<0.0001	Šídák's
4b	1	Nuclear STAT1	Two-way ANOVA	F (1, 8) = 35.37	P=0.0003	Šídák's
4c	1	STAT3	Two-way ANOVA	F (1, 8) = 56.60	P<0.0001	Šídák's
4d	1	Migration	Unpaired t-test (two-tailed)	t=15.30, df=8	P<0.0001
4e	3	Chemotaxis to C5a	One-way ANOVA (Area-under-curve)	F (3, 8) = 33.96	P<0.0001
5c	2	Topic 3	One-way ANOVA	F (3, 10) = 17.48	P=0.0003
5c	2	Topic 5	One-way ANOVA	F (3, 10) = 16.72	P=0.0003
6g	1	Spare capacity	Unpaired t-test (two-tailed)	t=7.723, df=4	P=0.0015
6h	1	TNFa	One-way ANOVA	F (2, 12) = 946.2	P<0.0001
6h	1	IL-6	One-way ANOVA	F (2, 6) = 292.8	P<0.0001
6h	1	IP-10	One-way ANOVA	F (2, 9) = 104.2	P<0.0001
6i	1	Migration	Unpaired t-test (two-tailed)	t=7.897, df=6	P=0.0002
Ext. 1b	1,2,3	qPCR	One-way ANOVA	F (6, 8) = 94.25	P<0.0001	Šídák's
Ext. 2a	1	TLR4	Two-way ANOVA	F (1, 8) = 104.6	P<0.0001	Šídák's
Ext. 2b	1	IFNGR2	Two-way ANOVA	F (1, 24) = 254.3	P<0.0001	Šídák's
Ext. 2b	1	IFNGR1	Two-way ANOVA	F (1, 24) = 17.09	P=0.0004	Šídák's
Ext. 2c	2	TNFa	Two-way ANOVA	F (1, 8) = 4.487	P=0.0670	Šídák's
Ext. 2c	2	IL-6	Two-way ANOVA	F (1, 8) = 26.09	P=0.0009	Šídák's
Ext. 2c	2	IL-1b	Two-way ANOVA	F (1, 8) = 4.853	P=0.0587	Šídák's
Ext. 2c	2	IP-10	Two-way ANOVA	F (1, 8) = 41.85	P=0.0002	Šídák's
Ext. 2e	1	C1q	RM One-way ANOVA	F (1.737, 3.473) = 25.64	P=0.0087	Tukey's
Ext. 3b	1	ABCG1	Two-way ANOVA	F (1, 24) = 107.0	P<0.0001	Šídák's
Ext. 3c	1	ABCA1	Two-way ANOVA	F (1, 24) = 140.7	P<0.0001	Šídák's
Ext. 4a	1	Max respiration	Unpaired t-test (two-tailed)	t=15.00, df=4	P<0.0001
Ext. 4a	1	ATP-coupled respiration	Unpaired t-test (two-tailed)	t=15.18, df=4	P<0.0001
Ext. 4c	1	TMRE	Two-way ANOVA	F (1, 16) = 54.38	P<0.0001	Šídák's
Ext. 4h	1	myelin phagocytosis	Paired t-test (two-tailed)	t=1.186, df=2	P=0.3573
Ext. 4i	1	BSA uptake	RM Two-way ANOVA	F (1, 4) = 6.626	P=0.0617	Šídák's
Ext. 4j	1	Proteolysis Veh	Unpaired t-test (two-tailed)	t=32.07, df=4	<0.0001
Ext. 4j	1	Proteolysis ApoE4/CE/HDL	Unpaired t-test (two-tailed)	t=14.18, df=4	<0.0001
Ext. 5b	1	total STAT1	Two-way ANOVA	F (1, 8) = 8.390	P=0.0200	Šídák's
Ext. 5c	1	chemotaxis	Unpaired t-test (two-tailed) (Area-under-curve)	t=5.716, df=4	P=0.0046
Ext. 5d	3, second clone	chemotaxis	One-way ANOVA (Area-under-curve)	F (3, 8) = 28.36	P=0.0001	Šídák's
Ext. 6b	2	PILRA expression in IFN-response microglia vs Homeostatic	Unpaired t-test (two-tailed)	-4.00409	0.00197084
Ext. 6b	2	PILRA expression in Cycling vs Homeostatic	Unpaired t-test (two-tailed)	-6.92935	3.81224469592101e-07
